# Supplementary material
Source: PubMed Central journal article supplement (PMC4040332)
Supplement: NIHMS534206-supplement-Supporting_Information.pdf [file NIHMS534206-supplement-Supporting_Information.pdf]

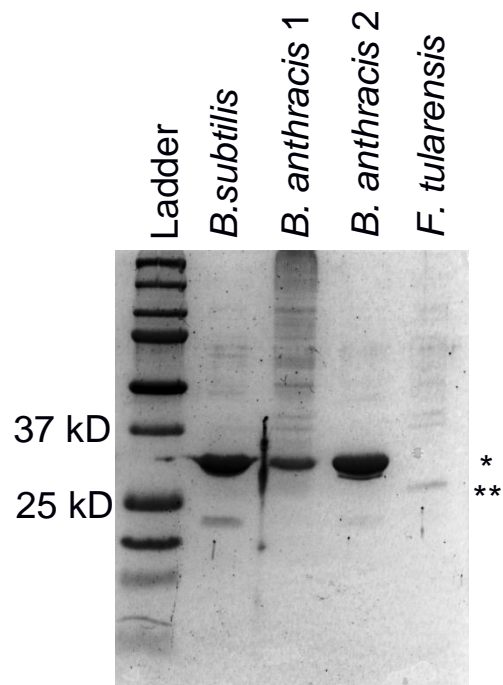

Figure S1. SDS-PAGE analysis of purified glutamate racemases from *B. subtilis* (\*), *B. anthracis* (\*), and *F. tularensis* (\*\*). Two isozymes exist in the case of *B. anthracis*. Molecular weight of glutamate racemases from *B. subtilis* and *B. anthracis* is ~31,500 and *F. tularensis* is ~29,300.

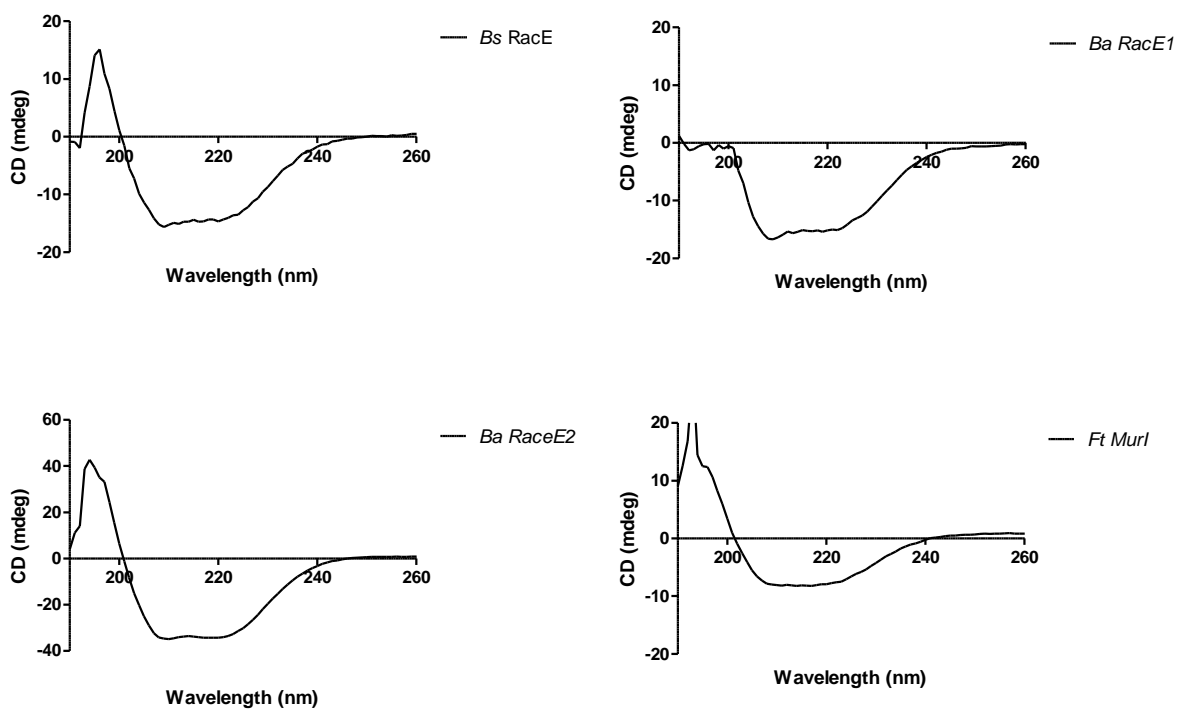

Figure S2. Circular dichroism of purified proteins to assess protein foldedness.

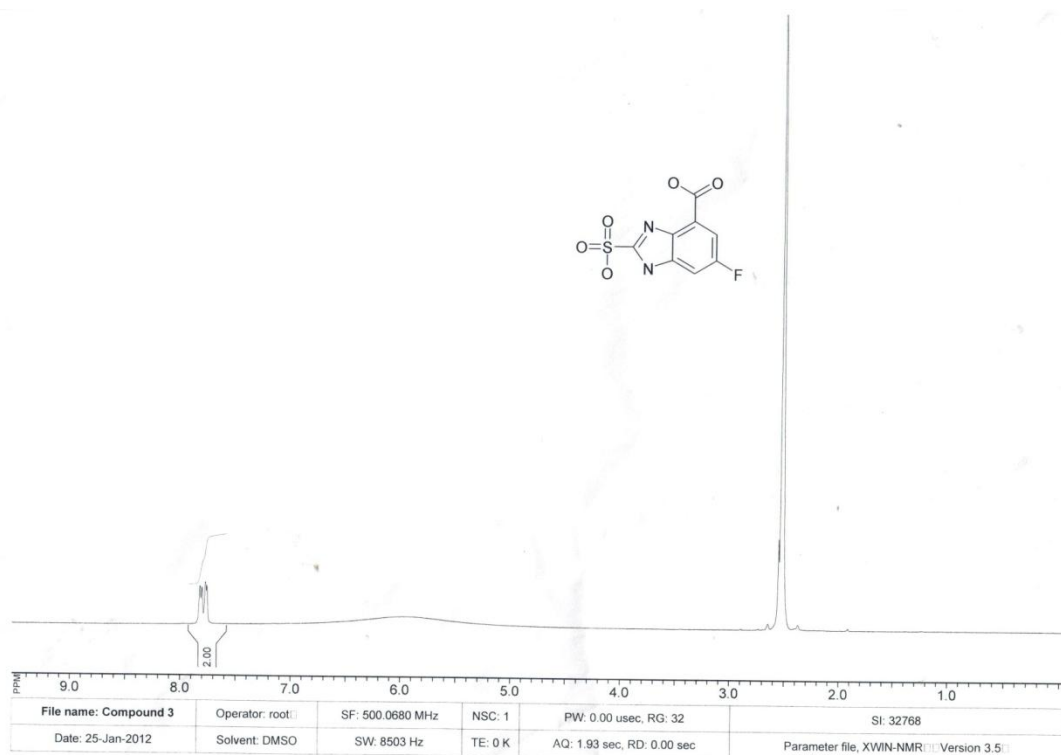

Figure S3. <sup>1</sup>H NMR spectra for compound **4**. Experiment conducted at ambient temperature. Peak at 2.50 corresponds to the employed solvent, DMSO.

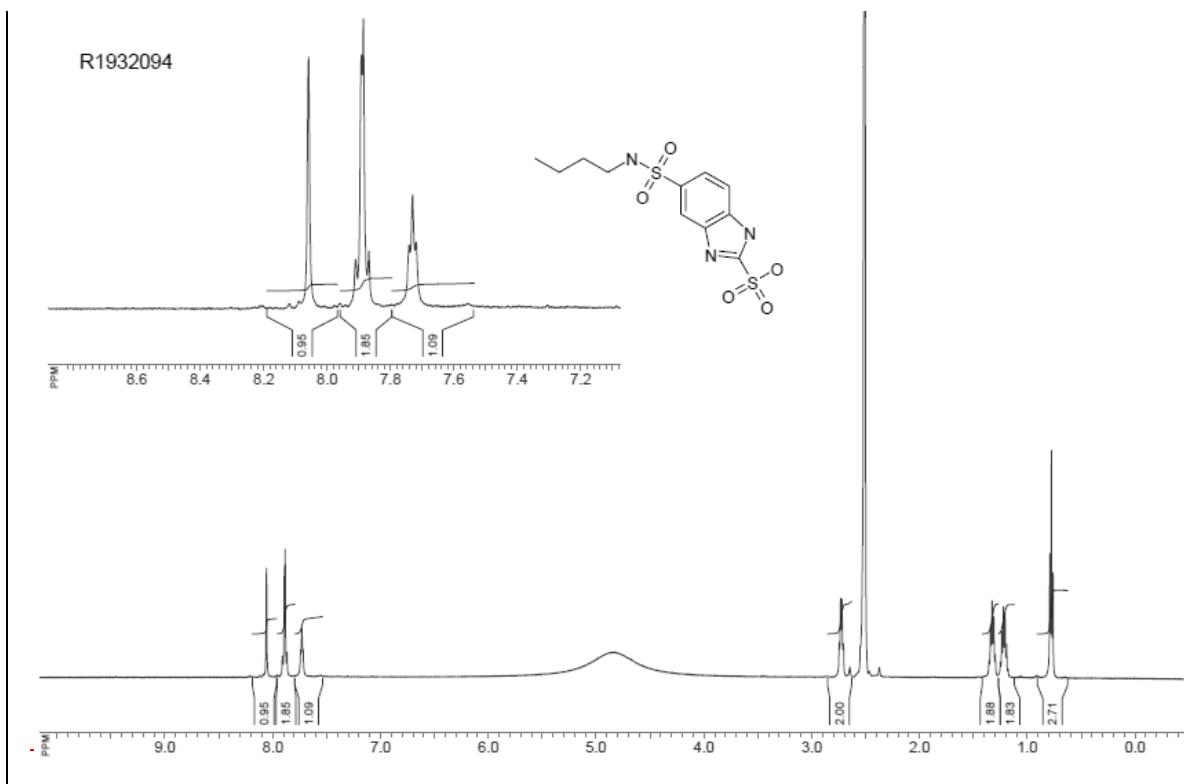

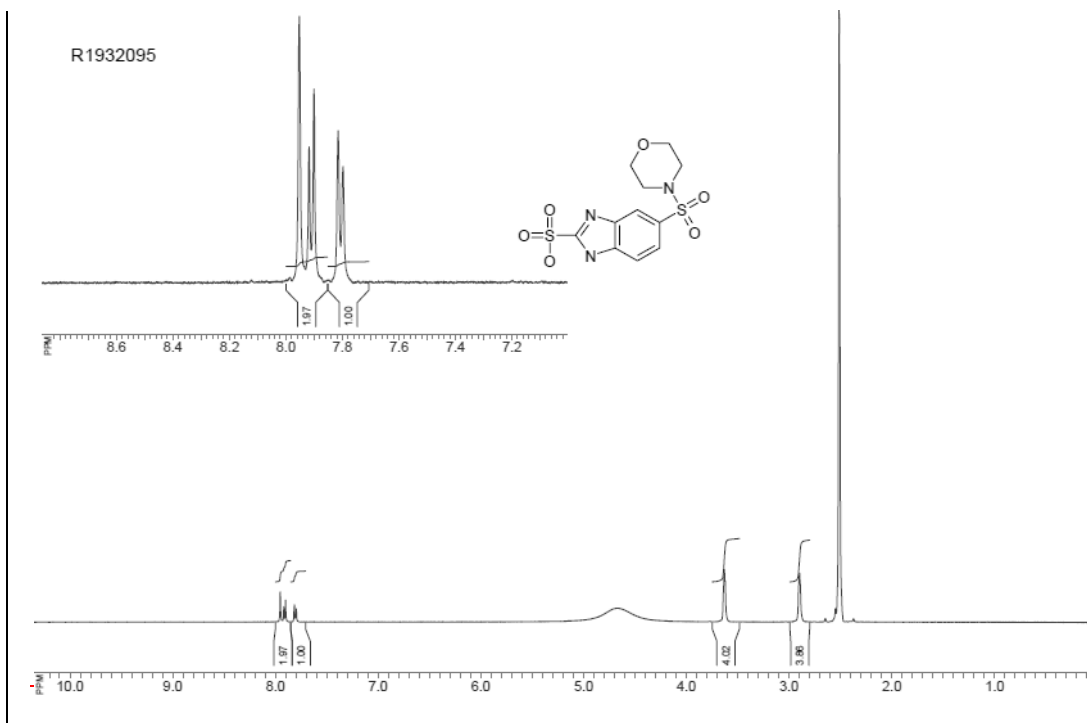

Figure S5.  $^1\text{H}$  NMR spectra for compounds **29**. Experiment conducted at ambient temperature. Peak at 2.50 corresponds to the employed solvent, DMSO.

MaxPeak: 98.14%  
Ret\_Time: 0.399 min

### Compound 3

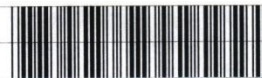

| # | Time  | Area% |
|---|-------|-------|
| 1 | 0.399 | 98.14 |
| 2 | 0.654 | 1.86  |

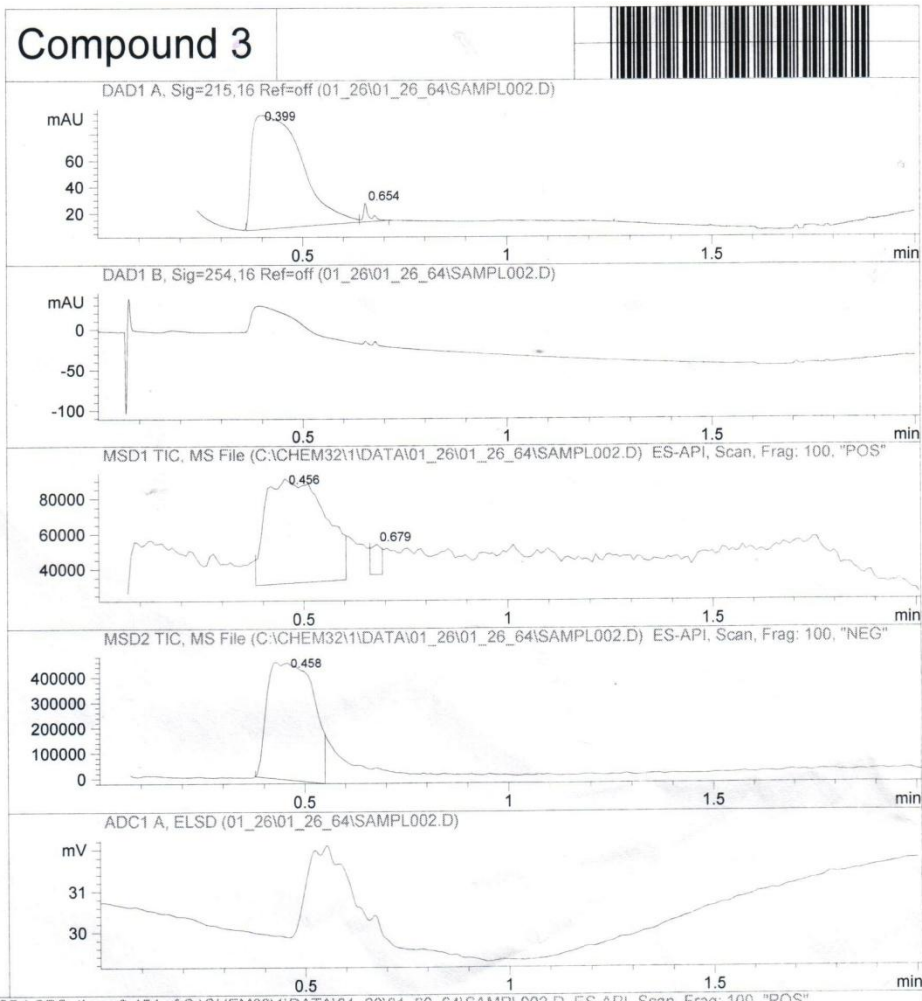

Figure S6. HPLC analysis of compound 4, showing 98.1% purity.

MaxPeak: 99.03%  
Ret\_Time: 0.645 min

# Compound 17

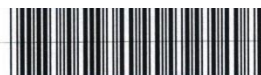

| # | Time  | Area% |
|---|-------|-------|
| 1 | 0.645 | 99.03 |
| 2 | 0.752 | 0.97  |

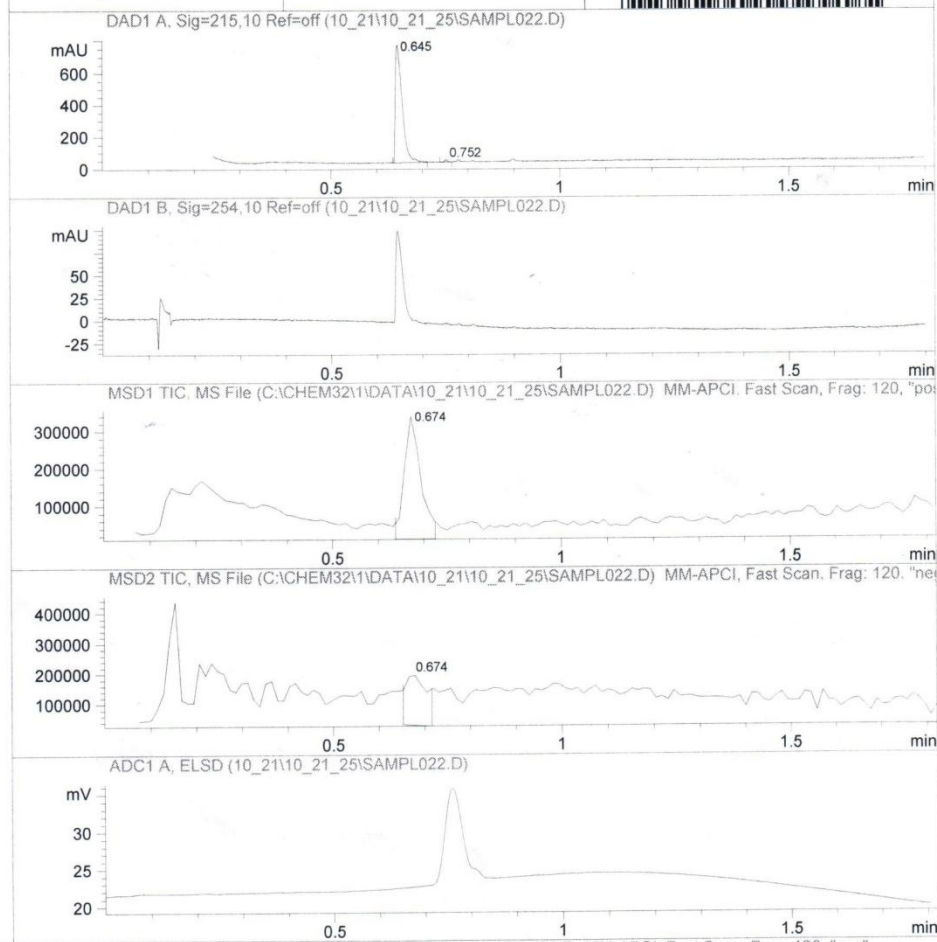

Figure S7. HPLC analysis of compound **18**, showing 99.0% purity.

MaxPeak: 100.00%  
Ret\_Time: 0.475 min

# Compound 29

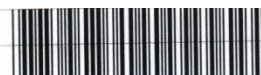

| # | Time  | Area%  |
|---|-------|--------|
| 1 | 0.475 | 100.00 |

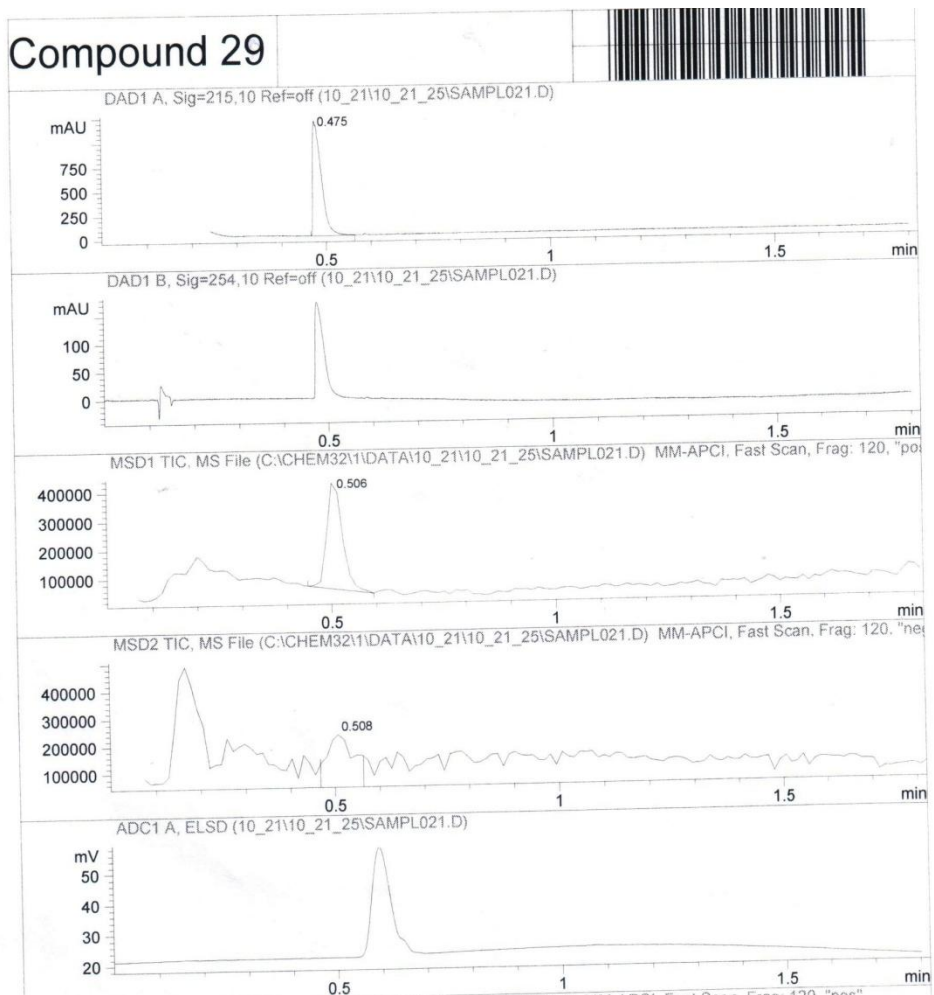

Figure S8. HPLC analysis of compound **29**, showing 100.0% purity.



| Inhibitor X with 10mM and 0.1mM Stocks |               |               |            |               |          |           |        |  |
|----------------------------------------|---------------|---------------|------------|---------------|----------|-----------|--------|--|
| Media (uL)                             | Compound (uM) | Compound (uL) | [Stock] uM | Inoculum (uL) | PBS (uL) | Final Vol | Column |  |
| 100                                    | 0             | 0             | 100        | 20            | 80       | 200       | 1      |  |
| 100                                    | 0.1           | 0.2           | 100        | 20            | 79.8     | 200       | 2      |  |
| 100                                    | 1             | 2             | 100        | 20            | 78       | 200       | 3      |  |
| 100                                    | 10            | 20            | 100        | 20            | 60       | 200       | 4      |  |
| 100                                    | 50            | 1             | 10000      | 20            | 79       | 200       | 5      |  |
| 100                                    | 100           | 2             | 10000      | 20            | 78       | 200       | 6      |  |
| 100                                    | 500           | 10            | 10000      | 20            | 70       | 200       | 7      |  |
| 100                                    | 1000          | 20            | 10000      | 20            | 60       | 200       | 8      |  |
| 100                                    | 1500          | 30            | 10000      | 20            | 50       | 200       | 9      |  |
| 100                                    | 2000          | 40            | 10000      | 20            | 40       | 200       | 10     |  |
| 100                                    | 2500          | 50            | 10000      | 20            | 30       | 200       | 11     |  |
| 100                                    | 3000          | 60            | 10000      | 20            | 20       | 200       | 12     |  |

| Column | 1           | 2           | 3           | 4           | 5           | 6           | 7           | 8           | 9           | 10          | 11          | 12          |
|--------|-------------|-------------|-------------|-------------|-------------|-------------|-------------|-------------|-------------|-------------|-------------|-------------|
| Row A  | Inhibitor 1 |
| Row B  | Inhibitor 1 |
| Row C  | Inhibitor 1 |
| Row D  | Blank       |
| Row E  | Blank       |
| Row F  | Inhibitor 2 |
| Row G  | Inhibitor 2 |
| Row H  | Inhibitor 2 |

Figure S9. Example of MIC50 reagent volumes for a single replicate of one inhibitor. Inhibitor concentration varies along the X-axis of the plate. Two compounds could be assayed in triplicate per 96-well plate of bacteria. Blank wells contain 100  $\mu$ L of phosphate-buffered saline (PBS) and 100  $\mu$ L of 2X media.

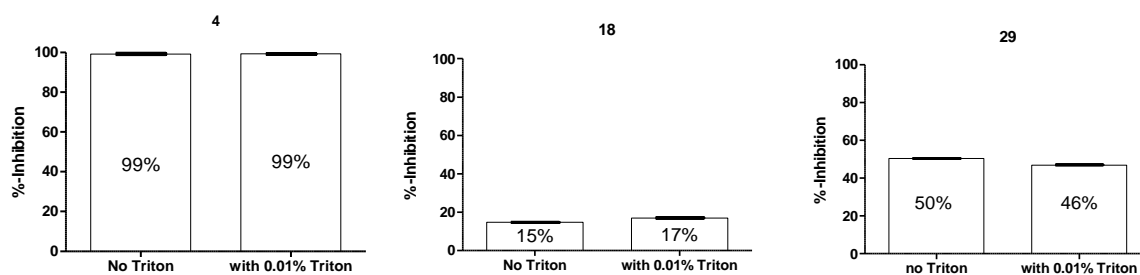

Figure S10. Colloidal aggregate testing for newly synthesized derivatives of 1*H*-benzimidazole-2-sulfonic acid. Racemase activity tested in the presence of a fixed concentration of inhibitor (200  $\mu$ M), 1 mM D-glutamate, and with or without 0.01% Triton X-100 included in the working buffer. %-Inhibition determined in triplicate with standard deviation shown (error bars).

### BISA Derivative MIC<sub>50</sub> vs *Lactococcus lactis*

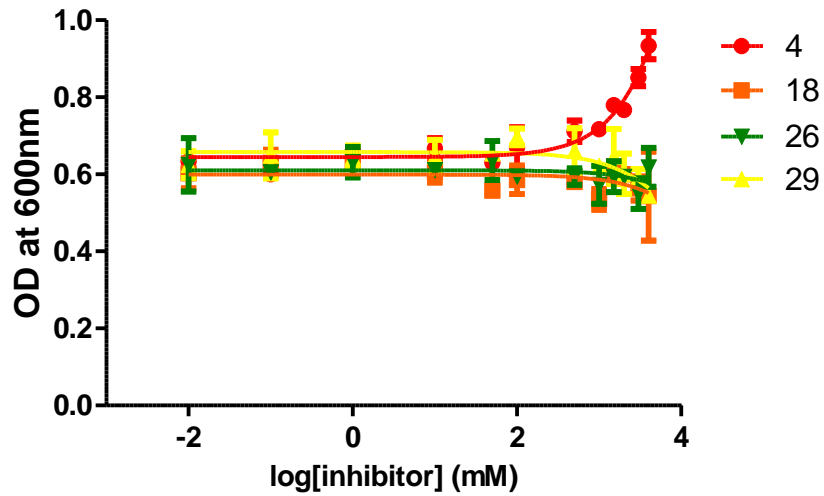

Figure S11. MIC<sub>50</sub> analysis of select derivatives of 1*H*-benzimidazole-2-sulfonic acid against *Lactococcus lactis*. Compounds **18** and **26** show no growth inhibition within the tested range of inhibitor concentrations. Compound **29** starts to show growth inhibition at the highest tested concentration. Surprisingly, compound **4** (a potent growth inhibitor against *B. subtilis*) causes noticeable growth activation compared to untreated cells. This is an unexpected phenomenon, which may be the result of productive metabolism of the inhibitor compound.
